# Supplementary material
Source: PubMed Central journal article supplement (PMC3163601)
Supplement: NIHMS130527-supplement-supplement_1.pdf [file NIHMS130527-supplement-supplement_1.pdf]

**Figure 4.** Invasive hemodynamic measurements using pressure-volume loops. **(A)** At day 35, cardiac output was significantly increased in hearts receiving control BMMCs compared to hearts receiving db/db BMMCs or PBS (\* $P$ <0.05). **(B)** Moreover, arterial elastance was significantly decreased in hearts receiving control BMMCs compared with hearts receiving PBS (\* $P$ <0.05). **(C-F)** At day 35, there was a trend toward improved functional recovery in animals receiving control BMMCs compared with animals receiving db/db BMMCs or PBS. This trend did not achieve statistical significance compared with db/db BMMCs.

**Figure 5.** Real-time polymerase chain reaction quantification of surviving male transplanted BMMCs within female heart. *Ex vivo* Taqman analysis of hearts undergoing LAD ligation following injection of db/db BMMCs versus control BMMCs revealed no significant difference in survival of transplanted cells. In both hearts cell, survival at day 35 after surgery was <1% (n=3 in control and n=5 in db/db group).

**Supplemental Table 1.** Hemodynamic measurements at day 35 show an improvement in cardiac function in animals treated with control BMMCs compared with db/db BMMCs or PBS treated animals. Cardiac output was significantly increased in animals treated with control BMMCs compared with db/db BMMCs (\* $P$ =0.016) or PBS (\*\* $P$ =0.019). Arterial elastance was significantly increased in animals treated with control BMMCs compared with animals treated with PBS (\*\* $P$ =0.04). Although a difference was found with the db/db BMMCs treated group as well, it did not reach statistical significance. Values are expressed means $\pm$ SEM and  $n \geq 5$  in every group.

| <b>Hemodynamic measurements</b>                               | <b>Control</b>        | <b>Db/Db</b>          | <b>PBS</b>              |
|---------------------------------------------------------------|-----------------------|-----------------------|-------------------------|
| <b>Heart rate (bpm)</b>                                       | 371.8000 ± 31.50302   | 299.7143 ± 12.15713   | 310.8333 ± 1.10516      |
| <b>End-systolic Volume (μL)</b>                               | 55.3400 ± 3.19931     | 51.3017 ± 2.52986     | 51.8800 ± 4.74516       |
| <b>End-diastolic Volume (μL)</b>                              | 63.6360 ± 2.23135     | 57.5083 ± 3.01150     | 56.3117 ± 5.33148       |
| <b>End-systolic Pressure (mmHg)</b>                           | 69.5100 ± 2.10101     | 73.9583 ± 3.95258     | 81.6080 ± 3.40416       |
| <b>End-diastolic Pressure (mmHg)</b>                          | 5.0433 ± .58769       | 10.0057 ± 2.30112     | 15.5633 ± 3.37423       |
| <b>Ejection Fraction (%)</b>                                  | 17.9760 ± 2.48784     | 13.6343 ± 2.36370     | 12.6750 ± 1.37203       |
| <b>Stroke Volume (μL)</b>                                     | 11.4120 ± 1.29213     | 7.7314 ± 1.60908      | 6.2720 ± .35942         |
| <b>Cardiac Output (μL/min)</b>                                | 4166.6740 ± 393.36234 | 2246.6257 ± 62.26386* | 2232.2583 ± 20.25357 ** |
| <b>Stroke Work (mmHg/μL)</b>                                  | 499.2500 ± 53.12623   | 418.2857 ± 102.06504  | 396.8000 ± 29.39456     |
| <b>Arterial Elastance (mmHg/μL)</b>                           | 6.4960 ± .98299       | 9.1583 ± 1.29994      | 11.8580 ± 1.47995 ***   |
| <b>dPdt max (mmHg/sec)</b>                                    | 3674.6000 ± 643.38904 | 3460.1667 ± 254.87833 | 4021.1667 ± 251.95177   |
| <b>dPdt min (mmHg/sec)</b>                                    | -2952.800 ± 431.74001 | -2945.714 ± 340.12272 | -2947.167 ± 129.45641   |
| <b>Tau_w (msec)</b>                                           | 9.6950 ± 1.19048      | 11.5483 ± .70846      | 12.2880 ± 1.09732       |
| <b>Maximal Power (mWatts)</b>                                 | 2.9800 ± .39496       | 1.8357 ± .41301       | 1.7817 ± .18080         |
| <b>Preload adjusted maximal power (mWatts/μL<sup>2</sup>)</b> | 7.7060 ± 1.41500      | 6.8560 ± .46881       | 5.0660 ± .54417         |

**Supplemental Table 1**
